# Supplementary material
Source: HighWire-hosted journal article supplement (http://molpharm.aspetjournals.org/highwire/filestream/77424/field_highwire_adjunct_files/0/Supplemental_Data_97584.pdf)
Supplement: Supplemental_Data_97584.pdf [file Supplemental_Data_97584.pdf]

## A Sexual Dimorphism Influences Bicyclol-Induced Hepatic Heat Shock Factor 1 Activation and Hepatoprotection

Xiaosong Chen, Jianjian Zhang, Conghui Han, Huijuan Dai, Xianming Kong,

Longmei Xu, Qiang Xia, Ming Zhang and Jianjun Zhang

Molecular Pharmacology

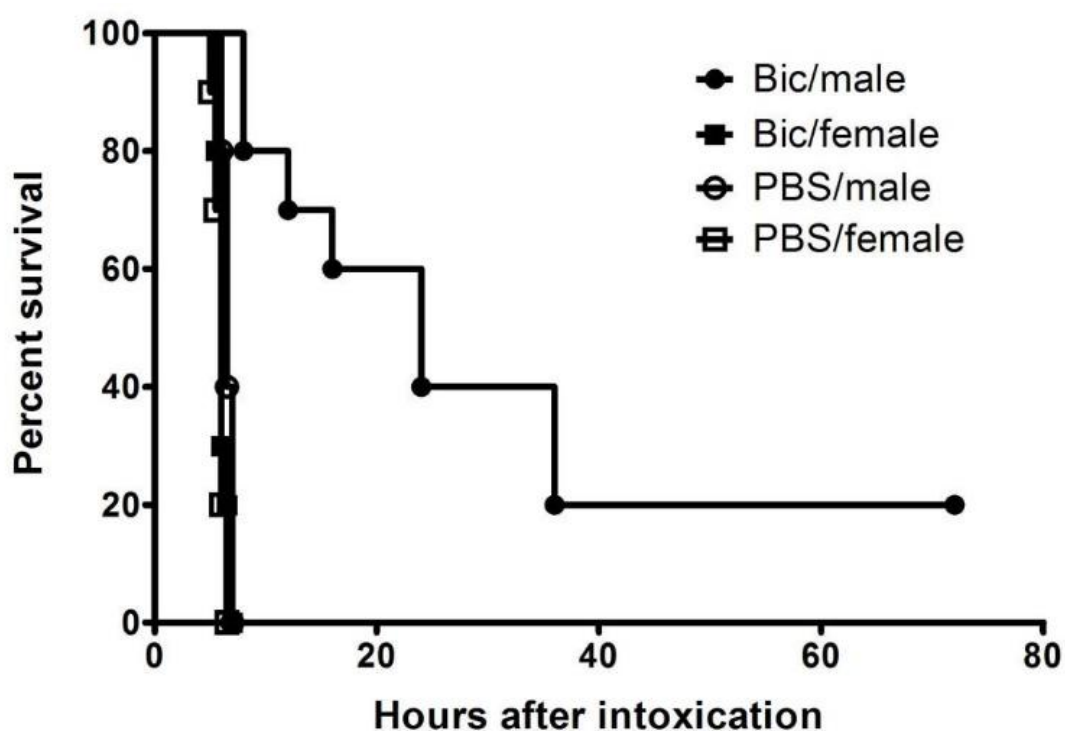

**Supplemental Figure 1. The sex difference remained when bicyclol was administered after GalN/LPS intoxication.** A single dose of bicyclol (300 mg/kg) was administered at 1 h after GalN/LPS intoxication and survival of mice was observed thereafter (n=10 per group). The treatment led to a significant survival advantage only in male mice by Kaplan-Meier analysis (log-rank test,  $P < 0.05$  between Bic/male and other groups).

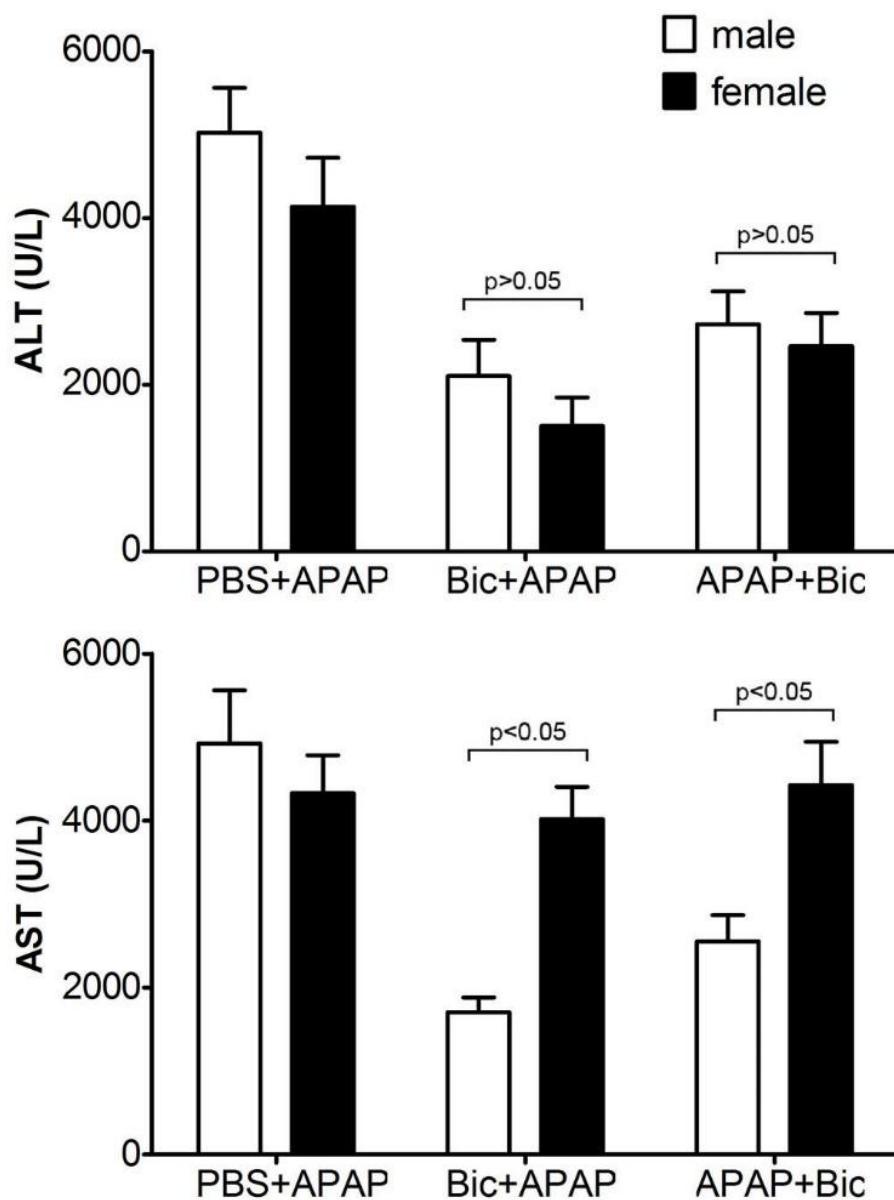

**Supplemental Figure 2. The sex difference in bicyclol-induced hepatoprotection against APAP toxicity.** Male or female mice were orally administered with three doses of bicyclol (300 mg/kg) or PBS, followed by intraperitoneal injection of 300 mg/kg of APAP (Bic+APAP). Separate groups received one dose of bicyclol at 1 h after APAP treatment (APAP+Bic). Serum ALT and AST concentrations at 6 h after APAP injection were shown (n=4 per group). Statistical significance or insignificance were indicated.

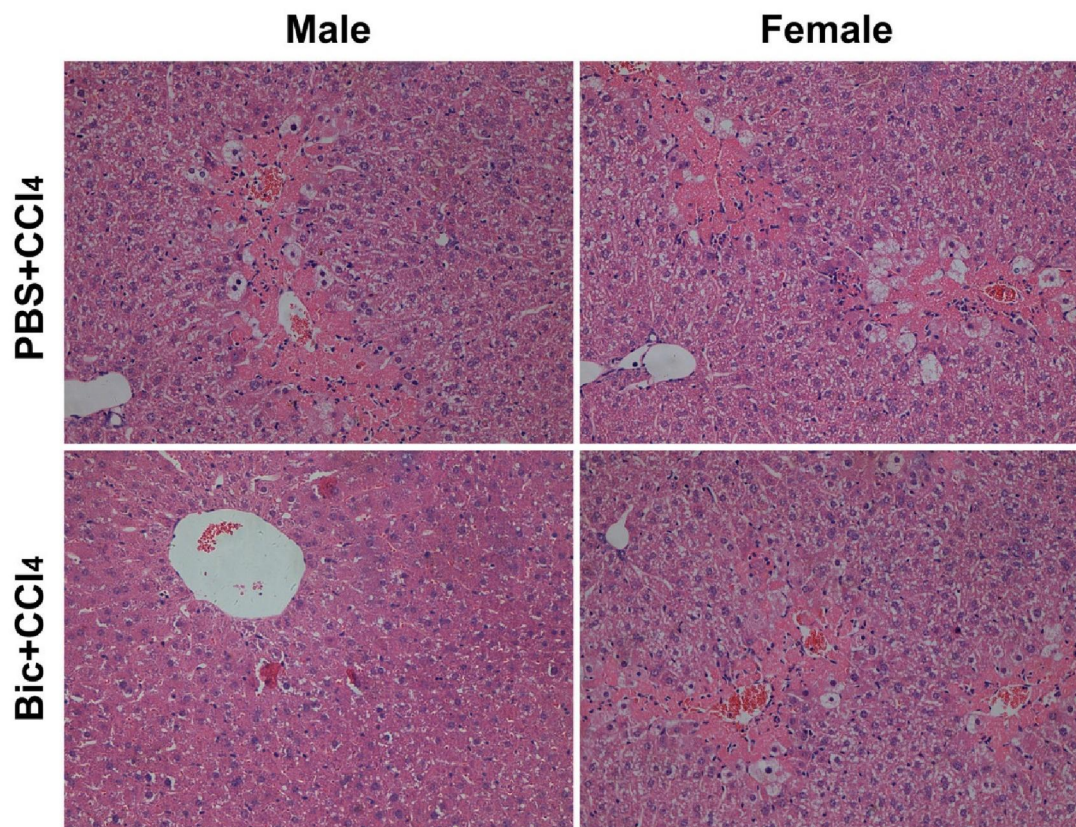

**Supplemental Figure 3. The sex difference in bicyclol-induced hepatoprotection against CCl<sub>4</sub> toxicity.** Male or female mice were orally administered with three doses of bicyclol (300 mg/kg) or PBS, followed by intraperitoneal injection of carbon tetrachloride (0.4% diluted in olive oil) at a single dose of 10 ml/kg. Representative HE-stained sections from post-intoxication livers harvested at 48 h. (original magnification,  $\times 200$ ). There were 4 mice in each group and different individuals in the same group showed consistent results.
